# Supplementary material for: Single-cell transcriptomics reveal the heterogeneity and dynamic of cancer stem-like cells during breast tumor progression
Source: PubMed Central journal article supplement (PMC8531288; doi:10.1038/s41419-021-04261-y), 2021-10-21
Supplement: 41419_2021_4261_MOESM2_ESM.pdf [file 41419_2021_4261_MOESM2_ESM.pdf]

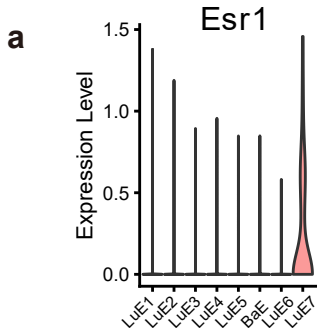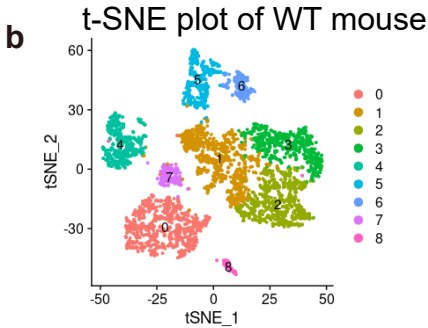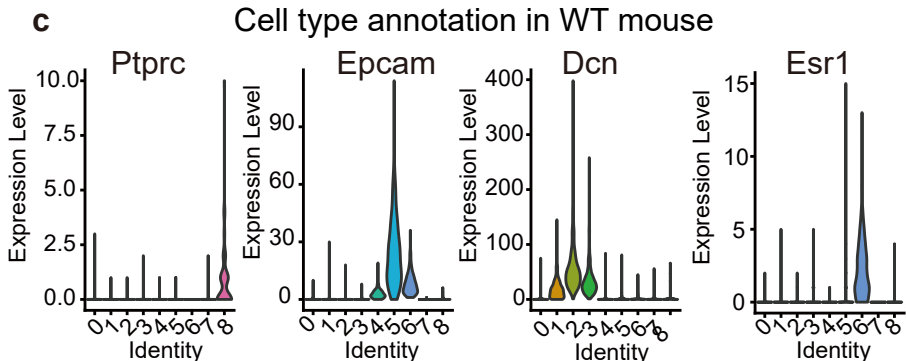

**d**

| Cluster | 0   | 1   | 2   | 3   | 4   | 5   | 6   | 7   | 8  |
|---------|-----|-----|-----|-----|-----|-----|-----|-----|----|
| Counts  | 878 | 843 | 705 | 594 | 467 | 386 | 184 | 165 | 76 |
