# Supplementary material for: Single-cell transcriptomics reveal the heterogeneity and dynamic of cancer stem-like cells during breast tumor progression
Source: PubMed Central journal article supplement (PMC8531288; doi:10.1038/s41419-021-04261-y), 2021-10-21

**a**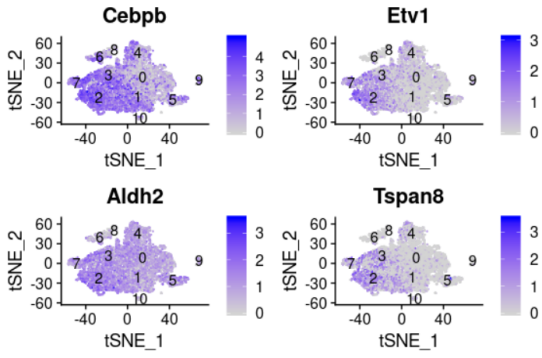**b**

Stemness associated gene list  
used by GSVA algorithm

| Marker Used | References     |
|-------------|----------------|
| Aldh3a2     | PMID: 30220009 |
| Aldh1a3     | PMID: 31340763 |
| Aldh2       | PMID: 31480503 |
| Cd24a       | PMID: 31340763 |
| Itgb1       | PMID: 27197172 |
| Itgb6       | PMID: 31340763 |
| Epcam       | PMID: 31340763 |
| Cd14        | PMID: 21930782 |
| Kit         | PMID: 28719381 |
| Prom1       | PMID: 18241344 |
| Ly6a        | PMID: 19048122 |
| Cd44a       | PMID: 26516409 |
| Mme         | PMID: 28719381 |
| Itgb3       | PMID: 31555586 |
| Sox9        | PMID: 30206184 |
| Nectin4     | PMID: 25940879 |
| Flot2       | PMID: 19951611 |
| Vegta       | PMID: 21802218 |

**c**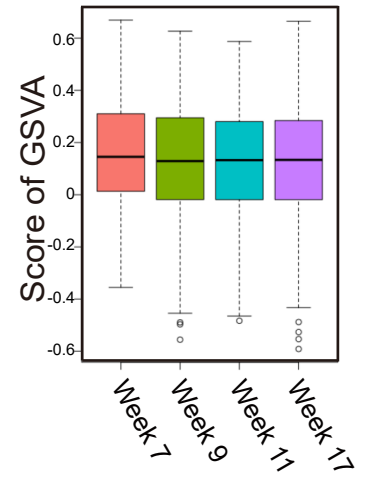**d**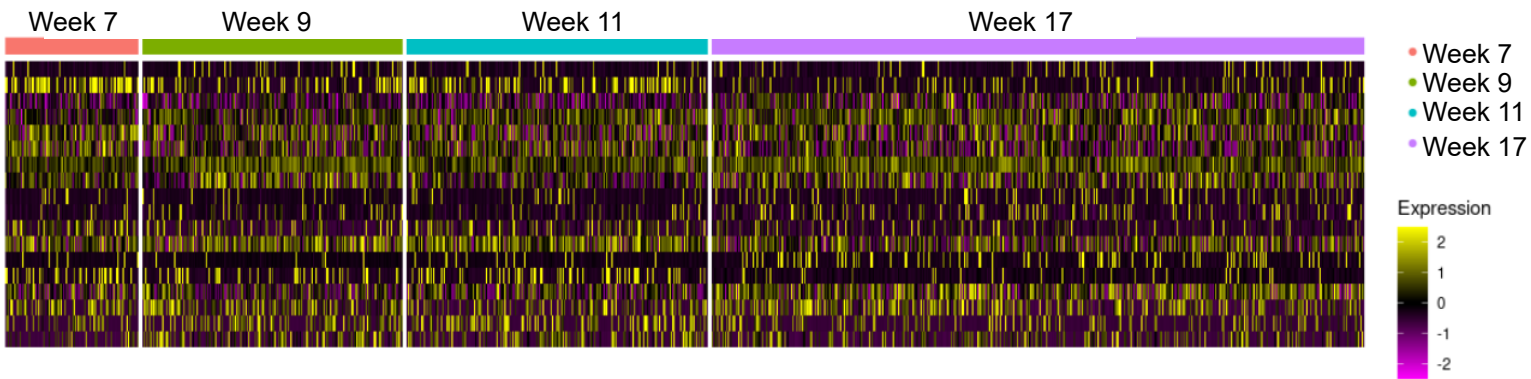

Supplement: 41419_2021_4261_MOESM3_ESM.pdf [file 41419_2021_4261_MOESM3_ESM.pdf]
