# Supplementary material for: Single-cell transcriptomics reveal the heterogeneity and dynamic of cancer stem-like cells during breast tumor progression
Source: PubMed Central journal article supplement (PMC8531288; doi:10.1038/s41419-021-04261-y), 2021-10-21

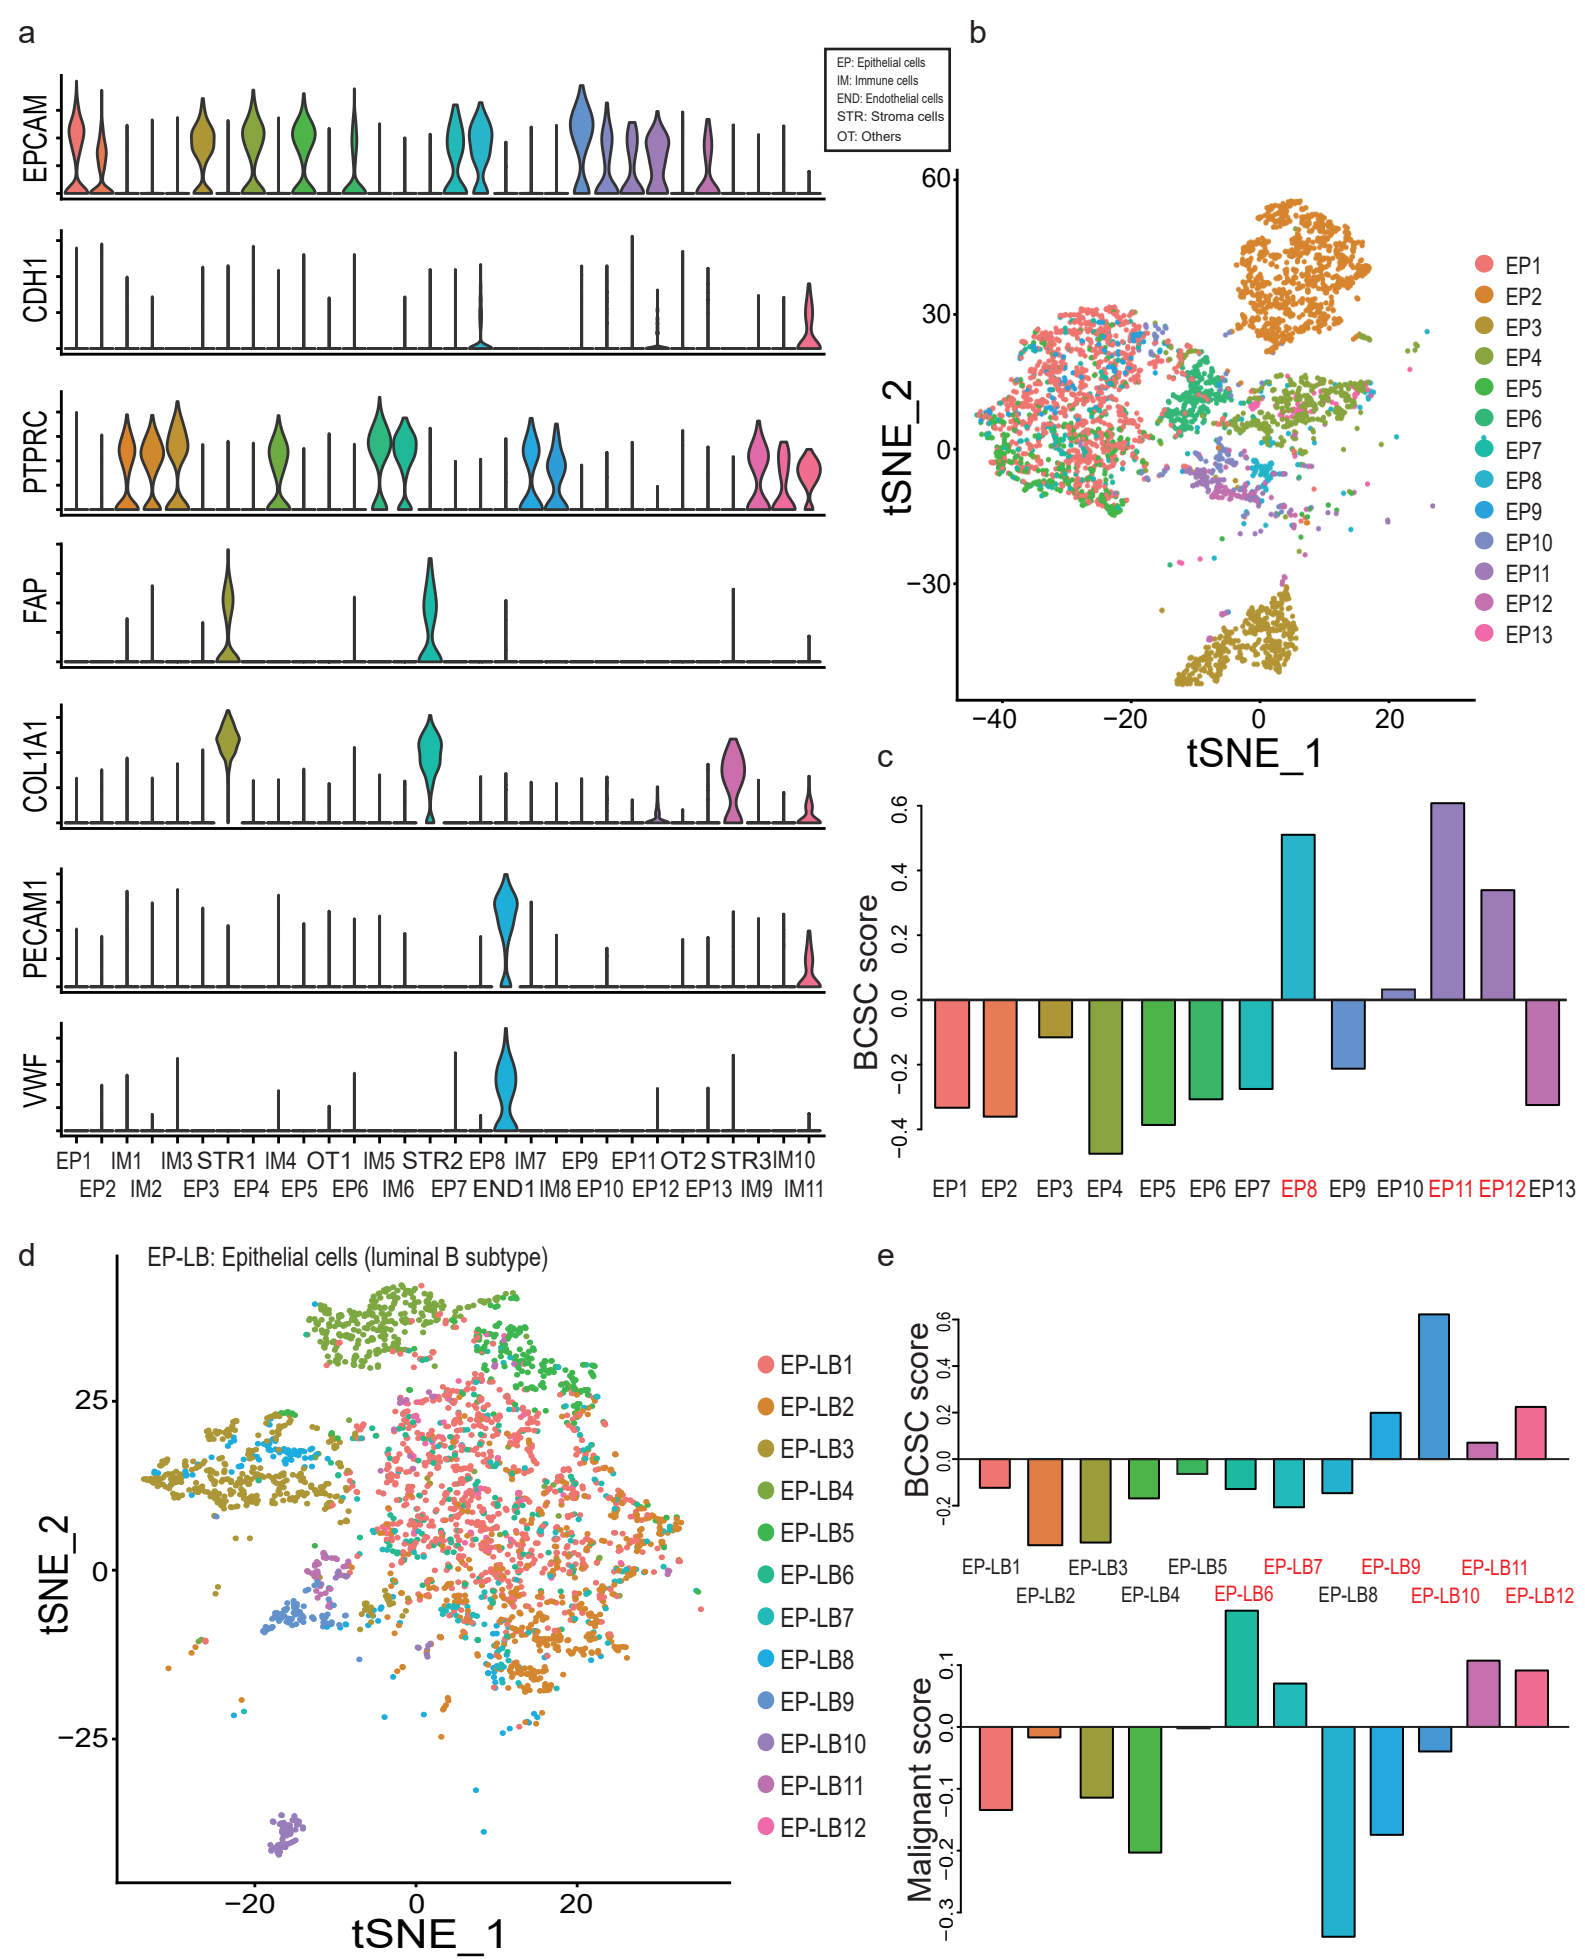

Supplement: 41419_2021_4261_MOESM4_ESM.pdf [file 41419_2021_4261_MOESM4_ESM.pdf]
